# Supplementary material for: Gatifloxacin Loaded Nano Lipid Carriers for the Management of Bacterial Conjunctivitis
Source: MDPI journal article supplement (doi:10.3390/antibiotics12081318), 2023-08-15
Supplement: s1 [file s1]

## Gatifloxacin Loaded Nano Lipid Carriers for the management of Bacterial Conjunctivitis

**Table S1. HPLC chromatographic conditions for gatifloxacin.**

|                         |                                                                                                                                                         |
|-------------------------|---------------------------------------------------------------------------------------------------------------------------------------------------------|
| Solvent delivery module | Alliance Waters e2695 separations module                                                                                                                |
| Data processor          | Waters® Empower Chromatography Data System Software                                                                                                     |
| Sensitivity             | 2.0 AUFS                                                                                                                                                |
| Mobile phase            | A mixture of phosphate buffer (18 mM) containing 0.1% v/v triethylamine (pH 2.8, adjusted with dilute phosphoric acid) and methanol (60:40 v/v)         |
| Column                  | Waters Symmetry® C <sub>18</sub> , (150 x 4.6 mm, 5 µm)                                                                                                 |
| Flow rate               | 1.2 mL/min                                                                                                                                              |
| Injection volume        | 20 µL                                                                                                                                                   |
| Detector                | UV-Vis                                                                                                                                                  |
| Wavelength (λ max)      | 294 nm                                                                                                                                                  |
| Column temperature      | Room temperature                                                                                                                                        |
| Sample holder           | Room temperature                                                                                                                                        |
| Retention time          | 6.5 min                                                                                                                                                 |
| Linearity range         | 1-100 µg/mL (R <sup>2</sup> = 0.998)                                                                                                                    |
| Limit of detection      | 0.24 µg/mL                                                                                                                                              |
| Limit of quantification | 0.71 µg/mL                                                                                                                                              |
| Accuracy                | % recovery was within 100.8-102 using 9 determinations over 3 concentration levels covering the specified range (10, 20, and 80 µg/mL) with % RSD < 2.0 |
| % RSD for Precision     | < 2                                                                                                                                                     |
